# Supplementary material
Source: PubMed Central journal article supplement (PMC4963316)
Supplement: mmc1.pdf [file mmc1.pdf]

प्रश्नोत्तरी 2 (30 प्रश्नों के साथ 5 पृष्ठ)

व्यक्तिगत विवरण (इसे गोपनीय रखा जाएगा)

नाम आयु / लिंग : ई-मेल आईडी :  
शैक्षिक योग्यता / डिग्री : कार्य की स्थिति :  
कार्य अनुभव (वर्ष) धर्म : संपर्क नंबर :

प्रश्नोत्तरी (कृपया उपयुक्त उत्तर पर निशान लगाए)

1. क्या आपको पता है कि कुछ रोगियों के अंग काम करना बंद कर देते हैं (जैसे गुर्दे, लिवर, फेफड़े या हृदय) उन्हें अंग प्रतिरोपण (ट्रांसप्लांट) से लाभ हो सकता है?
  - i. हां
  - ii. नहीं
2. क्या आपको पता है कि हमारे देश में दान किए गए अंगों की गंभीर कमी है?
  - i. हां
  - ii. नहीं
3. क्या आपको पता है कि ऐसे व्यक्तियों द्वारा अंगों का दान किया जा सकता है जिन्हें एक सरकारी अधिकृत अस्पताल में सक्षम प्राधिकारी द्वारा मस्तिष्क (brain-dead) की मौत होने के लिए प्रमाणित किया गया हो?
  - i. हां
  - ii. नहीं
4. मस्तिष्क की मौत (brain dead) वाले दाता से निम्नलिखित में से किन अंगों को सफलतापूर्वक निकाला जा सकता है और प्रतिरोपण (ट्रांसप्लांट) में उपयोग किया जा सकता है?
  - i. गुर्दे
  - ii. लिवर
  - iii. हृदय
  - iv. फेफड़े
  - v. आंख
  - vi. हृदय के वॉल्व
  - vii. हड्डियां
  - viii. ये सभी
5. क्या आप मस्तिष्क की मौत (brain dead) का अर्थ समझते हैं?
  - i. हां
  - ii. इसके बारे में और अधिक जानना चाहूंगा
  - iii. पता नहीं
6. यदि हां तो मस्तिष्क की मौत (brain dead) के बारे में जानकारी यहां से मिली
  - i. मीडिया-टीवी / समाचार पत्र / पत्रिका
  - ii. इंटरनेट

- iii. अस्पताल जागरूकता कार्यक्रम / स्वास्थ्य प्रदर्शनी  
iv. पाठ्यक्रम पढ़ाना
7. आप कहां से जानकारी पाना चाहेंगे  
i. मीडिया : टीवी / समाचार पत्र / पत्रिका  
ii. इंटरनेट  
iii. परिवार या रिश्तेदार या दोस्त  
iv. स्वास्थ्य देखभाल प्रणाली  
v. पाठ्यक्रम पढ़ाना
8. क्या आपने अंगदान और / या प्रतिरोपण (ट्रांसप्लांट) के बारे में कोई पोस्टर देखा है?  
i. हां  
ii. नहीं
9. क्या आपके परिवार / दोस्तों / रिश्तेदारों में से किसी को अंग प्रतिरोपण (ट्रांसप्लांट) की आवश्यकता है?  
i. हां  
ii. नहीं
10. क्या आपके परिवार / दोस्तों / रिश्तेदारों में से किसी ने अंग प्रतिरोपण (ट्रांसप्लांट) कराया है?  
i. हां  
ii. नहीं
11. आपके परिवार में अंग प्रतिरोपण (ट्रांसप्लांट) की आवश्यकता वाली बीमारी होने पर क्या आप एक मरे हुए मस्तिष्क वाले (brain dead) व्यक्ति (दाता) से अंग प्राप्त करने पर विचार करेंगे?  
i. बिल्कुल नहीं  
ii. हां, किन्तु कुछ शर्तों के साथ (कृपया समझाएं)  
iii. हां
12. क्या आप जानते हैं कि आप एक सरकारी अधिकृत संगठन (जैसे एम्स में Organ Retrieval and Banking Organization ओ. आर. बी. ओ.) में अंगदाता के रूप में नाम दर्ज करके दाता कार्ड प्राप्त कर सकते हैं?  
i. हां  
ii. नहीं
13. क्या आप ऐसा दाता कार्ड पाना चाहेंगे?  
i. हां  
ii. नहीं  
iii. मेरे पास है

14. क्या आप मरणोपरान्त अपने अंगों का दान करना चाहेंगे?
- बिल्कुल नहीं
  - हां, किन्तु कुछ शर्तों के साथ (कृपया समझाएं)
  - हां, किसी प्रतिबंध के बिना
15. यदि पिछले प्रश्न का उत्तर "बिल्कुल नहीं" है तो इसके क्या कारण हो सकते हैं? (आप जिन तीन उत्तरों को सबसे अधिक उपयुक्त मानते हैं उन पर निशान लगाएं) :
- शरीर का आकार बिगड़ जाने का डर
  - धार्मिक मान्यता
  - स्वास्थ्य देखभाल प्रणाली में विश्वास की कमी
  - प्रोत्साहन का अभाव
  - अन्य कोई कारण – कृपया समझाएं
16. परिवार को मस्तिष्क की मौत (brain dead) वाले व्यक्ति के अंगदान में दिलचस्पी है?
- बिल्कुल नहीं
  - थोड़ी
  - हां
17. आपके अनुसार अंगदान के बारे में आपके परिवार की सोच / मान्यताओं से परिचित होना महत्वपूर्ण है?
- बिल्कुल नहीं
  - थोड़ा
  - हां
18. यदि आपका परिवार सहमत होता है तो क्या आप अंगदान करेंगे?
- बिल्कुल नहीं
  - हां, किन्तु कुछ शर्तों के साथ (कृपया समझाएं)
  - हां, किसी प्रतिबंध के बिना
19. यदि परिवार की सहमति के बारे में पता नहीं है तब भी क्या अंगदान करेंगे?
- बिल्कुल नहीं
  - हां, किन्तु कुछ शर्तों के साथ (कृपया समझाएं)
  - हां, किसी प्रतिबंध के बिना

20. धार्मिक प्राधिकरण / पुजारी / काजी / आध्यात्मिक गुरु की राय और सलाह
- मुझे पता नहीं है और मैं जानना नहीं चाहता
  - मुझे पता नहीं है, किन्तु मैं जानना चाहता हूँ
  - मुझे पता है, शायद मैं प्रभावित हूँ
  - मुझे पता है, किन्तु मैं प्रभावित नहीं हूँ
21. रोगी (मस्तिष्क की मौत हो सकने वाला (brain dead) दाता) की सहमति / पूर्व स्वीकृति का महत्व (एक से अधिक उत्तरों पर निशान लगा सकते हैं)
- सहमत, सबसे महत्वपूर्ण दाता की इच्छा है
  - माता पिता / नजदीकी रिश्तेदार दान के बारे में निर्णय ले सकते हैं, जब यह पता नहीं हो कि दाता इसकी इच्छा रखता था या नहीं
  - नामनिर्दिष्ट अस्पताल प्राधिकरण दान के बारे में निर्णय ले सकते हैं, जब यह पता नहीं हो कि दाता इसकी इच्छा रखता था या नहीं
22. यदि मरने वाला रोगी पंजीकृत अंगदाता है तो क्या अंग दान के लिए परिवार की सहमति अनिवार्य है?
- हां
  - हां, कुछ विशिष्ट परिस्थितियों के तहत (कृपया समझाएं)
  - नहीं, दाता की इच्छा का सम्मान किया जाना चाहिए
23. "मौत के बाद अंगदान के लिए संभावित सहमति" (अर्थात संभावित रूप से मरने वाले दाता के नजदीकी रिश्तेदारों की सहमति के बिना उसके अंग प्राप्त करना) क्या आप इससे सहमत हैं ?
- सहमत
  - कुछ विशेष परिस्थितियों में सहमत (कृपया समझाएं)
  - पूरी तरह असहमत (कृपया संक्षेप में कारण बताएं)
24. हमारे देश में होने वाले अंगों के व्यापार के बारे में आपके क्या विचार हैं ?
- ऐसा होता है और एक सामाजिक आवश्यकता है
  - ऐसा होता है किन्तु बंद होना चाहिए
  - ऐसा नहीं होता
25. क्या आप सोचते हैं कि मौत के बाद अंगदान की राष्ट्रीय नीति बनाने से ऐसी गैर कानूनी प्रथाओं को रोका जा सकेगा?
- हां
  - नहीं

26. क्या आप सोचते हैं कि मौत के बाद अंगदान कार्यक्रम की सफलता के लिए स्वास्थ्य देखभाल प्रणाली में जनता का भरोसा / विश्वास महत्वपूर्ण पूर्वापेक्षा है
- हां
  - नहीं
27. क्या आप जानते हैं कि मौत के बाद अंगदान से शरीर में कोई विकृति या आकार खराब होने की स्थिति नहीं होती है?
- हां
  - नहीं
28. मस्तिष्क की मौत हो जाने की स्थिति में आपके विचार से मरने वाले रोगी के परिवार को सलाह मशवरा देने के लिए सबसे अधिक उपयुक्त व्यक्ति कौन है?
- डॉक्टर, जो इलाज करने वाले दल का सदस्य है
  - अन्य डॉक्टर, जिन्हें अस्पताल प्राधिकरण द्वारा नियुक्त किया गया हो
  - नर्स
  - आईसीयू संचालक / चिकित्सा सामाजिक कार्यकर्ता
29. क्या आप मौत के बाद (मस्तिष्क की मौत (brain dead)) अंगदान की संकल्पना से सहमत हैं या असहमत?
- अपने शरीर से कोई अंग अलग करने की रोकथाम के कारण असहमत
  - केवल कुछ अंग निकालने के लिए आंशिक रूप से सहमत
  - पूरी तरह सहमत, जब मैं मानता हूँ कि एक दिन मुझे भी अंग की जरूरत हो सकती है
  - नैतिक मुद्दे के कारण सहमत
30. हमारे देश में / अस्पताल में व्यक्तियों की मौत के बाद होने वाले अंगदान में कमी के आपके अनुसार क्या कारण हैं (कृपया 3 उत्तरों पर निशान लगाएं, जिन्हें आप सबसे अधिक संगत मानते हैं)
- जागरूकता की कमी
  - स्वास्थ्य देखभाल प्रणाली में भरोसे की कमी
  - धार्मिक मान्यताएं और अंधविश्वास
  - शरीर का आकार बिगड़ जाने का डर
  - प्रक्रिया में होने वाली देर / चिकित्सा कानूनी मुद्दों के डर से
  - मौत के बाद अंग दान के लिए लागू मौजूदा कानून में बदलाव की जरूरत
  - सरकार द्वारा प्रोत्साहनों की कमी
  - मौत के बाद अंग दान के लिए अपर्याप्त सलाह मशवरा
  - अन्य कोई (कृपया समझाएं)
